# Supplementary material for: Computer simulation to investigate the FRET application in DNA hybridization systems
Source: Royal Society of Chemistry journal article supplement (doi:10.1039/c0cp02058c), 2011-01-01
Supplement: c0cp02058c.pdf [file c0cp02058c.pdf]

## Supplementary Information

### The derivations of the transfer efficiency equations

From the Förster equation:

$$k_{RET} = \frac{9 \ln(10) \kappa^2 \Phi_D}{128 \pi^5 N_A \tau_D^0 n^4 R^6} \int_0^\infty I_D(\lambda) \varepsilon_A(\lambda) \lambda^4 d\lambda \quad (A)$$

The efficiency of FRET is,

$$E = \frac{k_{RET}}{\tau_D^{0^{-1}} + k_{RET}} \quad (B)$$

If the separation of donor and acceptor are at the Förster critical distance,  $R = R_0$ , the transfer efficiency is 1/2. By combining equation A and B,

$$\frac{1}{2} = \frac{k_{RET}}{\tau_D^{0^{-1}} + k_{RET}} = \frac{1}{(\tau_D^0 k_{RET})^{-1} + 1} = \frac{1}{\left( \frac{9 \ln(10) \kappa_{R=R_0}^2 \Phi_D}{128 \pi^5 N_A n^4 R_0^6} \int_0^\infty I_D(\lambda) \varepsilon_A(\lambda) \lambda^4 d\lambda \right)^{-1} + 1}$$

Therefore,

$$\begin{aligned} \frac{9 \ln(10) \kappa_{R=R_0}^2 \Phi_D}{128 \pi^5 N_A n^4 R_0^6} \int_0^\infty I_D(\lambda) \varepsilon_A(\lambda) \lambda^4 d\lambda &= 1 \\ R_0^6 &= \frac{9 \ln(10) \kappa_{R=R_0}^2 \Phi_D}{128 \pi^5 N_A n^4} \int_0^\infty I_D(\lambda) \varepsilon_A(\lambda) \lambda^4 d\lambda \\ \frac{R_0^6}{\kappa_{R=R_0}^2} &= \frac{9 \ln(10) \Phi_D}{128 \pi^5 N_A n^4} \int_0^\infty I_D(\lambda) \varepsilon_A(\lambda) \lambda^4 d\lambda \end{aligned} \quad (C)$$

In equation C,  $\kappa_{R=R_0}^2$  is the orientation factors at the critical distance. By substituting equation C into equation A, we can get,

$$k_{RET} = \frac{\kappa^2 R_0^6}{\kappa_{R=R_0}^2 \tau_D^0 R^6} \quad (D)$$

Substituting equation D into equation B,

$$E = \frac{1}{\frac{\kappa_{R=R_0}^2 R^6}{\kappa^2 R_0^6} + 1}$$

If  $\kappa_{R=R_0}^2$  is taken as  $2/3$ , the equation becomes,

$$E = \left(1 + \frac{2R^6}{3\kappa^2 \bar{R}_0^6}\right)^{-1} \quad (\text{E})$$

$\bar{R}_0$  means the Förster critical distance at which the transfer efficiency is  $1/2$  and the orientation factor,  $\kappa_{R=R_0}^2$ , is  $2/3$ .

This is how equation 6 was derived. The equation C thus becomes equation 5

$$\bar{R}_0^6 = \frac{9 \ln(10)(2/3)\Phi_D}{128\pi^5 N_A n^4} \int_0^\infty I_D(\lambda) \varepsilon_A(\lambda) \lambda^4 d\lambda \quad (\text{F})$$

If the orientation factor of donor and acceptor,  $\kappa^2$ , is isotropic and as  $2/3$ , the transfer efficiency is,

$$E = \left(1 + \frac{R^6}{\bar{R}_0^6}\right)^{-1}$$

This is the most popular equation of transfer efficiency, but it is only valid when the motions of donor and acceptor are almost random.
